# Supplementary material for: 2‐[3,5‐Bis‐(2‐fluorobenzylidene)‐4‐piperidon‐1‐yl]‐N‐(4‐fluorobenzyl)‐acetamide and Its Evaluation as an Anticancer Agent
Source: Hindawi journal article supplement (doi:10.1155/2013/935646), 2013-01-01

## SUPPLEMENTAL MATERIAL

### 2-[3,5-bis-(2-fluorobenzylidene)-4-piperidon-1-yl]-N-(4-fluorobenzyl)-acetamide and its Evaluation as an Anticancer Agent

**AUTHORS:** Pallavi Lagisetty, Hrushikesh Agashe and Vibhudutta Awasthi\*

**3,5-Bis-(2-fluorobenzylidene)-4-piperidone (2):**  $^1\text{H}$  NMR (300 MHz,  $\text{CDCl}_3$ ): 9.94 (s, 1H, NH), 7.90 (s, 2H, C=CH), 7.61-7.54 (m, 2H, Ar-H), 7.51 (t, 4H, Ar-H,  $J = 7.8$  Hz), 7.39 (q, 2H, Ar-H,  $J = 7.2$  Hz), 4.37 (s, 4H).  $R_f$  (60:40 Ethyl acetate:Hexanes) = 0.47.  $^{13}\text{C}$  NMR (100 MHz,  $\text{CDCl}_3$ ):  $\delta$  181.98, 172.09, 160.37 (d,  $J = 249.1$  Hz), 132.55 (d,  $J = 8.5$  Hz), 131.79 (d,  $J = 3.8$  Hz), 131.03 (d,  $J = 1.5$  Hz), 129.89, 124.95 (d,  $J = 3.2$  Hz), 121.52 (d,  $J = 13.1$  Hz), 116.09 (d,  $J = 21.0$  Hz), 43.85 (d,  $J = 3.1$  Hz), 21.16. ESI Mass calculated for  $\text{C}_{19}\text{H}_{16}\text{F}_2\text{NO}$  ( $\text{M}+\text{H}$ ) $^+$  312.12, found 312.13.

**4-Cyano-N,N,N-trimethylanilinium trifluoromethanesulfonate (4):**  $^1\text{H}$  NMR (300 MHz,  $\text{DMSO}-d_6$ ):  $\delta$  8.25-8.10 (m, 4H), 3.63 (s, 9H).  $^{13}\text{C}$  NMR (75 MHz,  $\text{DMSO}-d_6$ ):  $\delta$  150.7, 134.7, 122.6, 117.8, 113.6, 56.8.

**N-(4-fluorobenzyl)-2-bromoacetamide (11):**  $^1\text{H}$  NMR (300 MHz,  $\text{CDCl}_3$ ):  $\delta$  8.05 (br, 1H, NH), 7.35-7.20 (m, 2H, Ar-H), 7.03 (dd, 1H, Ar-H,  $J = 8.1, 1.5$  Hz), 4.44 (d, 2H, benzylic-H,  $J = 5.7$  Hz), 3.93 (s, 2H).  $^{13}\text{C}$  NMR (300 MHz,  $\text{CDCl}_3$ ):  $\delta$  168.6, 160.2, 129.5, 129.4, 115.8, 115.5, 43.5, 29.1.

**2-[3,5-Bis-(2-fluorobenzylidene)-4-piperidin-1-yl]-N-(4-fluorobenzyl)-acetamide (12):**  $^1\text{H}$  NMR (300 MHz,  $\text{CDCl}_3$ ):  $\delta$  7.93 (s, 1H), 7.83 (s, 2H, C=CH), 7.75-7.02 (m, 8H, Ar-H), 6.97 (dd, 2H, Ar-H,  $J = 7.2, 2.1$  Hz), 6.68 (t, 2H, Ar-H,  $J = 7.2$  Hz), 4.19 (s, 2H, benzylic), 4.17 (s, 2H), 3.76 (s, 4H). ESI Mass calculated for  $\text{C}_{28}\text{H}_{23}\text{F}_3\text{N}_2\text{NaO}_2$  ( $\text{M}+\text{Na}$ ) $^+$  499.16, found 499.91.

**HPLC of radiolabeled synthon (8) and  $^{18}\text{F}$ -NFLOBA-EF24 (9):** Compound **8** was analyzed by C-18 reverse phase high performance chromatography (RP-HPLC). It showed a retention time

of 14.2 min in radio-UV-RPHPLC (5% to 100% acetonitrile containing 0.1% TFA, over 15 min) at 254 nm wavelength. Compound **8** was used as an  $^{18}\text{F}$ -labeled synthon for conjugation with compound **2** in the next step. The conjugation product of compound **8** and **2** was compound **9**. Compound **9** had a retention time of 14.6 min (5% to 100% acetonitrile gradient containing 0.1% TFA, over 15 min) at 254 nm wavelength (Figure 2).

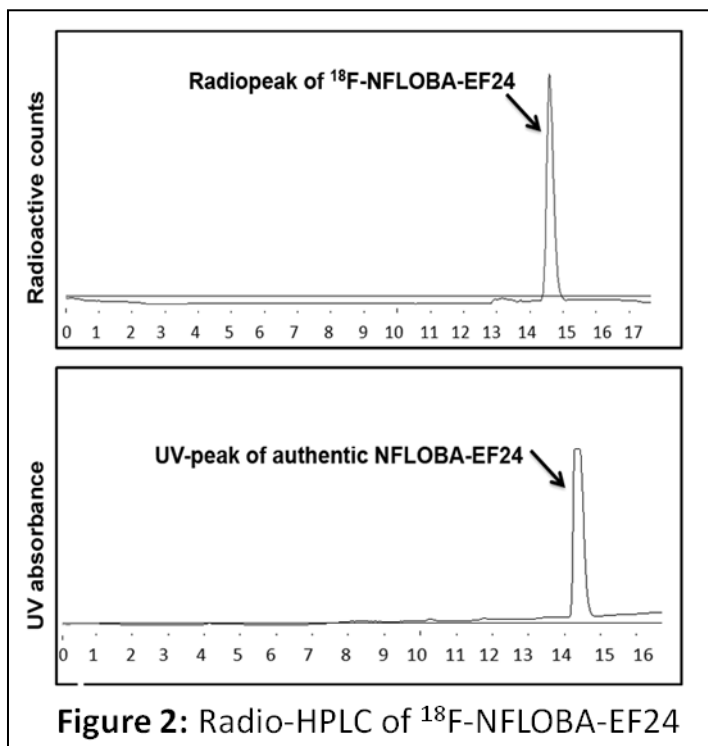

Supplement: f1 [file 935646.f1.pdf]
